# Supplementary material
Source: PubMed Central journal article supplement (PMC8171496)
Supplement: NIHMS1698510-supplement-Supple_tables_fig.pdf [file NIHMS1698510-supplement-Supple_tables_fig.pdf]

**Electronic supplementary material (ESM)**

## Supplementary materials

**Table S1.** Oligonucleotide sequences

| Accession number                          | Target gene (size)               | Primer name            | Sequence (5'- to 3'-)            | Oligo used for |                   |
|-------------------------------------------|----------------------------------|------------------------|----------------------------------|----------------|-------------------|
| NM_007343.3                               | <i>PRSS3-V1/TRY4</i><br>(124 bp) | <i>V1</i>              | F CTGCGAGGCGCTGGG                | RT-PCR         |                   |
|                                           |                                  |                        | R GCAGAAGTGGGAGCCAGAAT           |                |                   |
| NM_002771.3                               | <i>PRSS3-V2</i><br>(140 bp)      | <i>V2</i>              | F ATCCTTGCCTTTGTGGGAGC           |                |                   |
|                                           |                                  |                        | R GCAGAAGTGGGAGCCAGAAT           |                |                   |
| NM_001197097.2                            | <i>PRSS3-V3</i><br>(129 bp)      | <i>V3</i>              | F GTGCGCCATTGGTTTTCCAT           |                |                   |
|                                           |                                  |                        | R GCAGAAGTGGGAGCCAGAAT           |                |                   |
| NM_001197098.1                            | <i>PRSS3-V4</i><br>(131 bp)      | <i>V4</i>              | F CGACTCGCATGGGACCTG             |                |                   |
|                                           |                                  |                        | R GCAGAAGTGGGAGCCAGAAT           |                |                   |
| <i>PRSS3</i> - Common Region (101 bp)     |                                  | <i>Vc</i>              | F ATTCTGGCTCCCACTTCTGC           |                |                   |
|                                           |                                  |                        | R CTCTCCCAGTCTCACCTGGA           |                |                   |
| NM_002046                                 | GAPDH<br>(189 bp)                | <i>GAPDH</i>           | F GAGGCGGAGGAGAACAAACA           | MSP            |                   |
|                                           |                                  |                        | R CCATGGAGAAGGCTGGG              |                |                   |
| NC_000009.12<br>(33750466<br>to 33799231) | <i>PRSS3</i><br>(152 bp)         | <i>MF</i>              | GGTACGCGGATAGGGAGGGGATATC        |                |                   |
|                                           |                                  | <i>MR</i>              | TAATATACGCATCGATACCGCAACCCG      |                |                   |
|                                           | <i>PRSS3</i><br>(155 bp)         | <i>UF</i>              | GGGTATGTGGATAGGGAGGGGATATT       |                |                   |
|                                           |                                  | <i>UR</i>              | AATAATATACACATCAATACCACAACCCA    |                |                   |
| <i>PRSS3</i><br>(286 bp)                  | <i>BF</i>                        | TTGATTTGTATGGGATTTGTGG | BQ                               |                |                   |
|                                           | <i>BR</i>                        | ACCTTCCCCTCACCTACAAC   |                                  |                |                   |
| NM_007343.3                               | <i>PRSS3</i>                     | <i>PRSS3/TRY4</i>      | F GGAGGATGTGCGGACCTGACGACAG      |                | cDNA<br>construct |
|                                           |                                  |                        | R GATCTTAGCTGTTGGCAGCGATGGTGTCTT |                |                   |
| <i>PRSS3</i> - Common Region              |                                  | <i>siPRSS3-1</i>       | GGGACACUCUGGACAAUGA              |                | RNA<br>inference  |
|                                           |                                  | <i>siPRSS3-2</i>       | GAUCAUCCGCCACCCUAAA              |                |                   |

GAPDH: glyceraldehyde-3-phosphate dehydrogenase; F: forward; R: reverse; M: methylated, U: unmethylated.



Supplementary Figure

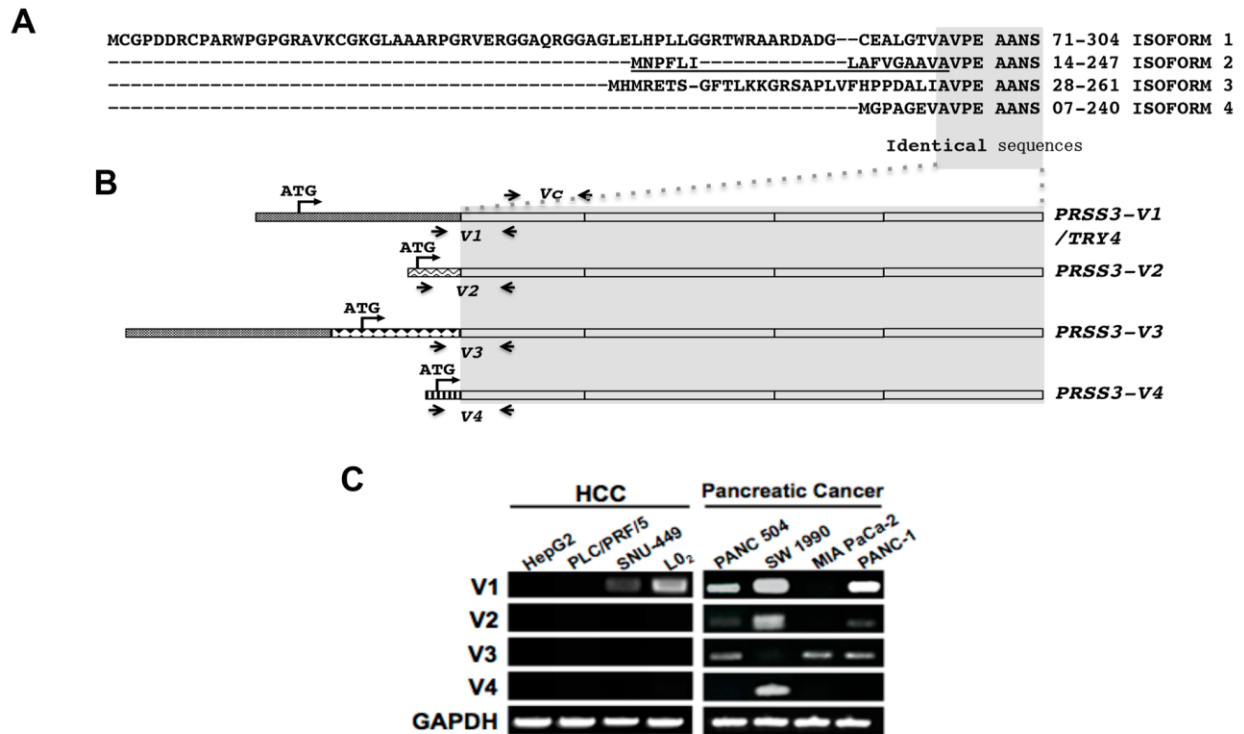

**Fig. S1** A. Alignment of the amino acid sequences of the PRSS3 isoforms. The sequences highlighted in gray indicate the identical sequences among the isoforms. The underlined sequences indicate a signal peptide. B. A schematic representation of the human *PRSS3* gene illustrating the existence of exons for each transcript variant. The position of RT-PCR primers is indicated by black arrows. C. The mRNA expression of PRSS3 variants in human HCC and pancreatic cancer cell lines analyzed by semi-quantitative RT-PCR. The constituent and abundant expression of *PRSS3* in pancreatic cancer cell lines was selected as endogenous internal controls to ensure assay reliability. V1-V4: the RT-PCR products of PRSS3-V1 to V4; GAPDH: the internal control.
